# Supplementary material for: Hidden duplicates: 10s or 100s of Indian trials, registered with ClinicalTrials.gov, have not been registered in India, as required by law
Source: PLoS One. 2020 Jun 19;15(6):e0234925. doi: 10.1371/journal.pone.0234925 (PMC7304601; doi:10.1371/journal.pone.0234925)
Supplement: S4 Table — By using their regression coefficient values to identify the 0 or 1 status i.e whether they are true or false pairs, five pairs of fields (including two cases of concatenation of two fields each) out of 12, were identified as the best performing ones. (XLS) [file pone.0234925.s007.xls]

## Sheet: Sheet1
S6 Table. The regression coefficients of 12 variables obtained by the logistic regression model
	Feature	Coefficient	Rank
1	phase	0.00896942	6
2	study type	-0.0147499	5
3	location	-0.0187754	4
4	sample size	-0.0232634	2
5	status	-0.0082867	7
6	sponsor	-0.0637074	1
7	title_scientific	-0.0538543	1
8	title_public	-0.0624961	1
9	condition	-0.03477	1
10	intervention	-0.0784572	1
11	primary outcome	-0.0677776	1
12	study design	0.0237339	3
Details of the logistic regression model coefficient and model accuracy are available in S7 Text.
