# Supplementary material for: Hidden duplicates: 10s or 100s of Indian trials, registered with ClinicalTrials.gov, have not been registered in India, as required by law
Source: PLoS One. 2020 Jun 19;15(6):e0234925. doi: 10.1371/journal.pone.0234925 (PMC7304601; doi:10.1371/journal.pone.0234925)
Supplement: S9 Table — We manually examined 25 pairs each from the sets that fuzz and tfidf identified, to determine whether or not the pairs appeared to be truly incorrect. (XLS) [file pone.0234925.s012.xls]

## Sheet: Covering note
S12 Table.xls. (a) The lists of the 293 incorrect NCT-CTRI matches, picked up by fuzz and by tfidf and (b) a manual assessment of six fields from a sample of 50 CTG-CTRI pairs that the model predicted were incorrect. We manually examined 25 pairs each from the sets that fuzz and tfidf identified, to determine whether or not the pairs appeared to be truly incorrect.
Manual checking predicted that (a) 25 and (b) 22 matches picked up by fuzz and tfidf, respectively were incorrect matches.

## Sheet: 293 incorrect NCT-CTRI matches_by fuzz
NCT Number	CTRI number
NCT03997110	CTRI/2018/04/012925
NCT02030041	CTRI/2017/10/010185
NCT03799809	CTRI/2018/05/014250
NCT03975205	CTRI/2015/05/005775
NCT03969758	CTRI/2009/091/000084
NCT03923998	CTRI/2009/091/000486
NCT03920527	CTRI/2018/02/012060
NCT03415698	CTRI/2019/05/019387
NCT03876444	CTRI/2013/12/004264
NCT01384565	CTRI/2017/11/010373
NCT01698723	CTRI/2017/11/010373
NCT03109392	CTRI/2019/05/019109
NCT03822091	CTRI/2011/09/002032
NCT01958554	CTRI/2018/01/011596
NCT03807297	CTRI/2018/07/014944
NCT03807141	CTRI/2017/12/010898
NCT03784365	CTRI/2019/06/019819
NCT03766139	CTRI/2017/10/010246
NCT03745300	CTRI/2016/05/006960
NCT03741309	CTRI/2018/04/013038
NCT01764633	CTRI/2009/091/000443
NCT03716388	CTRI/2008/091/000076
NCT03043196	CTRI/2015/06/005910
NCT03671044	CTRI/2018/06/014390
NCT03638622	CTRI/2013/02/003373
NCT03616925	CTRI/2017/08/009386
NCT02612792	CTRI/2017/08/009386
NCT02120872	CTRI/2018/04/012987
NCT03533972	CTRI/2018/09/015803
NCT03519152	CTRI/2008/091/000216
NCT03516370	CTRI/2019/03/018148
NCT03511261	CTRI/2015/07/006001
NCT03480932	CTRI/2012/04/002540
NCT02829775	CTRI/2012/04/002540
NCT03420144	CTRI/2013/07/003851
NCT03396900	CTRI/2018/11/016450
NCT03338647	CTRI/2009/091/000085
NCT03289338	CTRI/2009/091/000532
NCT01124409	CTRI/2013/09/004022
NCT03237637	CTRI/2012/02/002406
NCT03230058	CTRI/2010/091/003041
NCT03207698	CTRI/2018/03/012621
NCT02350855	CTRI/2017/07/009084
NCT03133299	CTRI/2019/04/018405
NCT03089229	CTRI/2018/02/011983
NCT03952559	CTRI/2018/02/011983
NCT03026478	CTRI/2017/11/010321
NCT03004196	CTRI/2018/08/015194
NCT03003624	CTRI/2018/10/016166
NCT02985099	CTRI/2019/06/019508
NCT02979548	CTRI/2019/05/019082
NCT01402024	CTRI/2019/05/019082
NCT02935881	CTRI/2019/02/017440
NCT02920125	CTRI/2017/08/009571
NCT02903108	CTRI/2019/04/018697
NCT02875756	CTRI/2015/11/006356
NCT02868151	CTRI/2016/09/007302
NCT02867865	CTRI/2016/08/007199
NCT02800902	CTRI/2017/11/010370
NCT02786823	CTRI/2018/10/016153
NCT01276730	CTRI/2013/07/003815
NCT02773485	CTRI/2016/08/007156
NCT02924727	CTRI/2012/05/002653
NCT02757222	CTRI/2015/01/005405
NCT02738541	CTRI/2017/04/008394
NCT02738515	CTRI/2017/04/008327
NCT02731586	CTRI/2018/02/011734
NCT02713191	CTRI/2012/07/002844
NCT02683759	CTRI/2010/091/001221
NCT02683733	CTRI/2009/091/000693
NCT02649335	CTRI/2018/02/012024
NCT02645669	CTRI/2019/01/016850
NCT02645656	CTRI/2013/05/003609
NCT02645227	CTRI/2016/10/007417
NCT02119520	CTRI/2016/10/007417
NCT02642003	CTRI/2009/091/000073
NCT02639572	CTRI/2012/05/002628
NCT02598102	CTRI/2014/09/004970
NCT02154152	CTRI/2011/12/00228
NCT02545413	CTRI/2008/091/000078
NCT02545244	CTRI/2016/09/007311
NCT02541409	CTRI/2018/11/016457
NCT02492503	CTRI/2010/091/000170
NCT02473341	CTRI/2018/08/015499
NCT02460744	CTRI/2018/04/013174
NCT02440009	CTRI/2014/10/005142
NCT02124473	CTRI/2009/091/000279
NCT02413268	CTRI/2009/091/000838
NCT02390687	CTRI/2017/11/010432
NCT02357771	CTRI/2018/04/01302
NCT02330432	CTRI/2016/09/007246
NCT02329353	CTRI/2018/12/016565
NCT02318446	CTRI/2011/12/002217
NCT02265328	CTRI/2014/11/005196
NCT01694173	CTRI/2008/091/000046
NCT02587806	CTRI/2008/091/000046
NCT01536106	CTRI/2008/091/000046
NCT02240771	CTRI/2016/06/007049
NCT02222935	CTRI/2014/09/005047
NCT02173288	CTRI/2018/07/015084
NCT02161900	CTRI/2010/091/001297
NCT02145897	CTRI/2009/091/000243
NCT01592994	CTRI/2019/05/019278
NCT02135380	CTRI/2017/01/007727
NCT01870362	CTRI/2009/091/000006
NCT02081976	CTRI/2012/09/002981
NCT02048761	CTRI/2018/08/015285
NCT02033226	CTRI/2019/04/018718
NCT02025660	CTRI/2017/09/009870
NCT02020668	CTRI/2012/02/002443
NCT02013323	CTRI/2018/11/016422
NCT01985633	CTRI/2011/07/001891
NCT01453738	CTRI/2011/07/001891
NCT01984814	CTRI/2014/11/005231
NCT01983163	CTRI/2010/091/002944
NCT01977118	CTRI/2018/03/012500
NCT01958177	CTRI/2007/091/000003
NCT01914913	CTRI/2007/091/000003
NCT01955824	CTRI/2009/091/000142
NCT01950611	CTRI/2012/03/002515
NCT01947062	CTRI/2012/01/002323
NCT01933555	CTRI/2019/01/017163
NCT01924104	CTRI/2016/03/006736
NCT01917695	CTRI/2017/09/009886
NCT01908400	CTRI/2010/091/000176
NCT01883661	CTRI/2009/091/000690
NCT01877759	CTRI/2012/04/002560
NCT01591200	CTRI/2012/04/002560
NCT01876017	CTRI/2008/091/000257
NCT01870128	CTRI/2018/06/014450
NCT01857479	CTRI/2018/07/014884
NCT01836562	CTRI/2011/091/000159
NCT01834079	CTRI/2011/091/000159
NCT01834066	CTRI/2011/091/000159
NCT01833975	CTRI/2011/091/000159
NCT01832454	CTRI/2011/091/000159
NCT01832441	CTRI/2011/091/000159
NCT01834053	CTRI/2011/05/001742
NCT01834040	CTRI/2018/01/011526
NCT01575639	CTRI/2017/12/010742
NCT01820052	CTRI/2012/05/002626
NCT03997123	CTRI/2009/091/000857
NCT01805258	CTRI/2013/10/004076
NCT01766323	CTRI/2018/08/015512
NCT01394861	CTRI/2019/02/017872
NCT01759823	CTRI/2010/091/001044
NCT01186679	CTRI/2010/091/001044
NCT01758146	CTRI/2017/09/009687
NCT01735877	CTRI/2009/091/001098
NCT01730183	CTRI/2009/091/000613
NCT01669122	CTRI/2011/12/002304
NCT01643629	CTRI/2012/04/002613
NCT01637454	CTRI/2014/09/005075
NCT01635777	CTRI/2018/05/014015
NCT01631890	CTRI/2018/06/014467
NCT01593943	CTRI/2010/091/001025
NCT01593306	CTRI/2010/091/000194
NCT01553981	CTRI/2016/02/006617
NCT01517022	CTRI/2012/11/003097
NCT01488825	CTRI/2019/05/018893
NCT01472289	CTRI/2017/02/007836
NCT01506401	CTRI/2014/06/004677
NCT01440621	CTRI/2009/091/000016
NCT01438450	CTRI/2016/08/007161
NCT02794337	CTRI/2016/08/007161
NCT01429766	CTRI/2012/08/002870
NCT01391065	CTRI/2018/01/011300
NCT01387841	CTRI/2018/10/015927
NCT01384578	CTRI/2015/10/006236
NCT01373853	CTRI/2015/12/006464
NCT01373359	CTRI/2014/08/00491
NCT01356355	CTRI/2014/08/004824
NCT01346566	CTRI/2019/05/019202
NCT01338324	CTRI/2018/03/012552
NCT01337778	CTRI/2007/091/000031
NCT01321827	CTRI/2019/05/019139
NCT01291095	CTRI/2018/03/012422
NCT01279135	CTRI/2012/12/003249
NCT01275768	CTRI/2012/12/003248
NCT01259544	CTRI/2009/091/00063
NCT01259349	CTRI/2009/091/00029
NCT01242592	CTRI/2009/091/000476
NCT01217190	CTRI/2018/06/014612
NCT01202383	CTRI/2017/05/008688
NCT01200732	CTRI/2011/06/001777
NCT01154959	CTRI/2011/05/001745
NCT01138865	CTRI/2016/02/006681
NCT01138176	CTRI/2016/01/006534
NCT01124929	CTRI/2019/03/018237
NCT01117402	CTRI/2016/05/006924
NCT01110447	CTRI/2008/091/000268
NCT02148094	CTRI/2018/03/012845
NCT01061580	CTRI/2017/07/008960
NCT01406717	CTRI/2009/091/000947
NCT02451033	CTRI/2012/02/002397
NCT01233258	CTRI/2012/02/002397
NCT02805257	CTRI/2011/06/001836
NCT03580044	CTRI/2018/09/015762
NCT03484507	CTRI/2010/091/000427
NCT02512952	CTRI/2017/03/007992
NCT02023411	CTRI/2009/091/000546
NCT01974518	CTRI/2013/01/003287
NCT01714817	CTRI/2013/01/003287
NCT01905735	CTRI/2018/05/013762
NCT01478997	CTRI/2011/07/001911
NCT01214473	CTRI/2019/04/018659
NCT01190995	CTRI/2019/06/019783
NCT01062308	CTRI/2013/07/003847
NCT02731638	CTRI/2015/05/005781
NCT02746991	CTRI/2014/12/005337
NCT03657394	CTRI/2013/01/003323
NCT02380989	CTRI/2017/10/010074
NCT01349062	CTRI/2011/05/001749
NCT01190982	CTRI/2009/091/000262
NCT02670772	CTRI/2011/05/001726
NCT01117298	CTRI/2018/03/012763
NCT01084096	CTRI/2017/04/008326
NCT02963766	CTRI/2015/02/005545
NCT01835431	CTRI/2015/02/005545
NCT02408484	CTRI/2013/09/003953
NCT02268045	CTRI/2011/10/002084
NCT03280147	CTRI/2017/09/009743
NCT01459328	CTRI/2018/01/011152
NCT01495000	CTRI/2011/12/002257
NCT03766295	CTRI/2015/10/006265
NCT03969212	CTRI/2017/08/009226
NCT03954834	CTRI/2014/01/004315
NCT03786380	CTRI/2019/03/018304
NCT03383146	CTRI/2019/03/018304
NCT03285308	CTRI/2019/03/018304
NCT03689374	CTRI/2018/10/015916
NCT03548935	CTRI/2018/06/014512
NCT03519945	CTRI/2019/06/019738
NCT03505723	CTRI/2014/06/004697
NCT03528681	CTRI/2009/091/000668
NCT03615924	CTRI/2019/04/018555
NCT03778229	CTRI/2018/10/016042
NCT03706690	CTRI/2019/02/017798
NCT03214380	CTRI/2010/091/000071
NCT03199053	CTRI/2011/09/001983
NCT03136484	CTRI/2010/091/006067
NCT03214367	CTRI/2012/09/003025
NCT02763566	CTRI/2017/10/010010
NCT01266811	CTRI/2017/11/010561
NCT03028740	CTRI/2019/01/017014
NCT02964247	CTRI/2012/10/003072
NCT01701232	CTRI/2012/10/003048
NCT01735175	CTRI/2014/09/005007
NCT02906917	CTRI/2014/03/004505
NCT02773368	CTRI/2014/03/004505
NCT02501161	CTRI/2014/03/004505
NCT02770807	CTRI/2017/02/007912
NCT01889433	CTRI/2011/091/000028
NCT01649557	CTRI/2012/02/002431
NCT01560624	CTRI/2010/091/000078
NCT01101334	CTRI/2010/091/001298
NCT01459809	CTRI/2011/091/000266
NCT01431274	CTRI/2012/04/002557
NCT01431287	CTRI/2012/04/002557
NCT03773978	CTRI/2014/07/004736
NCT01291511	CTRI/2012/03/002509
NCT01308437	CTRI/2016/02/006645
NCT01447394	CTRI/2009/091/000508
NCT01149655	CTRI/2009/091/000952
NCT01133990	CTRI/2011/07/0019
NCT01125566	CTRI/2010/091/00136
NCT01104792	CTRI/2009/091/000395
NCT01808092	CTRI/2012/07/002797
NCT01111552	CTRI/2013/11/004127
NCT01111539	CTRI/2013/11/004127
NCT01111565	CTRI/2013/11/004127
NCT03176238	CTRI/2017/03/008034
NCT01545050	CTRI/2012/12/003272
NCT01376167	CTRI/2010/091/000245
NCT01085136	CTRI/2010/091/001098
NCT02278120	CTRI/2017/08/009311
NCT01172548	CTRI/2017/07/009123
NCT01625390	CTRI/2008/091/000186
NCT02765503	CTRI/2010/091/000428
NCT01872234	CTRI/2012/03/002526
NCT01764022	CTRI/2010/091/001181
NCT01712438	CTRI/2009/091/001059
NCT01338415	CTRI/2012/05/002685
NCT03896685	CTRI/2016/02/006628
NCT03130114	CTRI/2012/07/002830
NCT01061151	CTRI/2017/01/007644
NCT02173821	CTRI/2019/05/019369
NCT03761225	CTRI/2018/02/012212
NCT02085408	CTRI/2010/091/000624
NCT01479283	CTRI/2018/04/013149
NCT01286779	CTRI/2012/01/002355
NCT01246882	CTRI/2019/04/018688
NCT01123707	CTRI/2017/10/010284

## Sheet: 293 incorrect NCT-CTRI  matches_by tfidf
NCT Number	CTRI number
NCT01593306	CTRI/2008/091/000029
NCT02330432	CTRI/2008/091/000292
NCT03199053	CTRI/2009/091/000100
NCT01149655	CTRI/2009/091/000175
NCT01472289	CTRI/2009/091/000481
NCT01649557	CTRI/2009/091/000953
NCT01835431	CTRI/2010/091/000145
NCT01101334	CTRI/2010/091/000491
NCT03671044	CTRI/2010/091/000610
NCT02085408	CTRI/2010/091/000624
NCT02867865	CTRI/2013/03/003497
NCT01805258	CTRI/2018/02/011794
NCT02773368	CTRI/2012/01/002367
NCT02501161	CTRI/2012/01/002367
NCT03969758	CTRI/2012/02/002445
NCT02033226	CTRI/2012/07/002771
NCT03176238	CTRI/2012/08/002900
NCT02278120	CTRI/2012/08/002900
NCT02670772	CTRI/2012/06/002716
NCT01917695	CTRI/2013/02/003373
NCT01275768	CTRI/2012/11/003103
NCT01735175	CTRI/2012/10/003065
NCT03745300	CTRI/2015/06/005910
NCT02013323	CTRI/2016/04/006864
NCT01698723	CTRI/2014/02/004403
NCT03689374	CTRI/2014/01/004285
NCT03484507	CTRI/2013/11/004139
NCT03923998	CTRI/2015/01/005405
NCT01764022	CTRI/2014/07/004722
NCT01279135	CTRI/2014/08/004819
NCT01560624	CTRI/2014/10/005146
NCT01950611	CTRI/2014/11/005202
NCT02757222	CTRI/2014/08/004823
NCT01291095	CTRI/2014/09/004980
NCT02765503	CTRI/2014/09/004980
NCT01977118	CTRI/2015/09/006194
NCT02268045	CTRI/2014/09/004959
NCT02731638	CTRI/2015/05/005781
NCT01431274	CTRI/2015/03/005597
NCT01431287	CTRI/2015/03/005597
NCT01394861	CTRI/2015/01/005373
NCT01138176	CTRI/2016/01/006534
NCT02408484	CTRI/2015/07/005953
NCT01914913	CTRI/2016/01/006497
NCT01133990	CTRI/2015/10/006331
NCT02829775	CTRI/2017/07/009027
NCT01712438	CTRI/2015/11/006373
NCT01701232	CTRI/2015/10/006315
NCT01625390	CTRI/2017/02/007755
NCT01429766	CTRI/2017/10/010291
NCT02763566	CTRI/2017/01/007695
NCT01764633	CTRI/2017/02/007841
NCT02868151	CTRI/2016/09/007315
NCT02645227	CTRI/2017/11/010370
NCT02612792	CTRI/2017/11/010370
NCT02119520	CTRI/2017/11/010370
NCT02541409	CTRI/2017/07/009052
NCT03997123	CTRI/2017/10/010010
NCT03716388	CTRI/2017/09/009748
NCT03784365	CTRI/2017/07/009181
NCT03214380	CTRI/2017/09/009591
NCT03214367	CTRI/2017/09/009591
NCT01190995	CTRI/2018/01/011267
NCT03519152	CTRI/2018/01/011352
NCT01438450	CTRI/2018/01/011353
NCT03952559	CTRI/2018/02/011972
NCT01495000	CTRI/2018/07/014908
NCT02773485	CTRI/2018/04/013218
NCT02357771	CTRI/2018/04/012930
NCT01124929	Symptoms
NCT01669122	CTRI/2018/04/013329
NCT02222935	CTRI/2018/07/014715
NCT02903108	CTRI/2019/04/018697
NCT03028740	CTRI/2019/01/017014
NCT03519945	CTRI/2018/10/016047
NCT03616925	CTRI/2019/04/018785
NCT02460744	CTRI/2019/02/017411
NCT01933555	CTRI/2019/01/017064
NCT03383146	CTRI/2019/03/018134
NCT03207698	CTRI/2019/03/018282
NCT02440009	CTRI/2019/05/019139
NCT02545244	CTRI/2019/05/019000
NCT03954834	CTRI/2019/06/019637
NCT01758146	CTRI/2007/091/000048
NCT03480932	CTRI/2008/091/000105
NCT01447394	CTRI/2008/091/000105
NCT01983163	CTRI/2008/091/000225
NCT03807141	CTRI/2009/091/000053
NCT01266811	CTRI/2009/091/000207
NCT03799809	CTRI/2009/091/000387
NCT01877759	CTRI/2009/091/000432
NCT01591200	CTRI/2009/091/000432
NCT01985633	CTRI/2009/091/000435
NCT01453738	CTRI/2009/091/000435
NCT01172548	CTRI/2009/091/000506
NCT03766295	CTRI/2009/091/000568
NCT01259544	CTRI/2009/091/00063
NCT01373359	CTRI/2009/091/000672
NCT02413268	CTRI/2009/091/000838
NCT01356355	CTRI/2009/091/000946
NCT02642003	CTRI/2009/091/001016
NCT01714817	CTRI/2010/091/000264
NCT02731586	CTRI/2010/091/000270
NCT02683733	CTRI/2010/091/000444
NCT02492503	CTRI/2010/091/000609
NCT01759823	CTRI/2010/091/001048
NCT02786823	CTRI/2010/091/00109
NCT03920527	CTRI/2010/091/001095
NCT01104792	CTRI/2010/091/0014
NCT01190982	CTRI/2010/091/002918
NCT02173821	CTRI/2011/04/001669
NCT01349062	CTRI/2011/05/001750
NCT01637454	CTRI/2011/07/001860
NCT03528681	CTRI/2011/07/001861
NCT01592994	CTRI/2011/07/001872
NCT01125566	CTRI/2011/07/001915
NCT01214473	CTRI/2011/11/002172
NCT01242592	CTRI/2011/11/002175
NCT03516370	CTRI/2011/12/002187
NCT02645669	CTRI/2011/12/002187
NCT02318446	CTRI/2011/12/002217
NCT01376167	CTRI/2012/03/002511
NCT01643629	CTRI/2012/04/002614
NCT02135380	CTRI/2012/05/002707
NCT01808092	CTRI/2012/07/002769
NCT01110447	CTRI/2012/07/002807
NCT01459809	CTRI/2012/08/002846
NCT02023411	CTRI/2012/08/002848
NCT01085136	CTRI/2012/09/002994
NCT01124409	CTRI/2012/11/003115
NCT03003624	CTRI/2012/11/003124
NCT03237637	CTRI/2012/12/003267
NCT02173288	CTRI/2013/05/003643
NCT01391065	CTRI/2013/05/003674
NCT01958177	CTRI/2013/10/004088
NCT02770807	CTRI/2013/10/004088
NCT01832454	CTRI/2013/10/004098
NCT01836562	CTRI/2013/10/004105
NCT01834079	CTRI/2013/10/004105
NCT01834066	CTRI/2013/10/004105
NCT01834053	CTRI/2013/10/004105
NCT01833975	CTRI/2013/10/004105
NCT01832441	CTRI/2013/10/004105
NCT01694173	CTRI/2013/10/004105
NCT02587806	CTRI/2013/10/004105
NCT01536106	CTRI/2013/10/004105
NCT03997110	CTRI/2013/11/004128
NCT01820052	CTRI/2013/11/004142
NCT01061151	CTRI/2013/12/004183
NCT01730183	CTRI/2014/01/004316
NCT01186679	CTRI/2014/01/004316
NCT02148094	CTRI/2014/01/004326
NCT01872234	CTRI/2014/04/004556
NCT02124473	CTRI/2014/05/004591
NCT02746991	CTRI/2014/07/004726
NCT03975205	CTRI/2014/08/004832
NCT01506401	CTRI/2014/08/004880
NCT01478997	CTRI/2014/09/005038
NCT02713191	CTRI/2014/10/005092
NCT01346566	CTRI/2014/10/005097
NCT02390687	CTRI/2014/11/005206
NCT01870362	CTRI/2014/11/005215
NCT01984814	CTRI/2014/11/005231
NCT01883661	CTRI/2014/11/005231
NCT01084096	CTRI/2014/12/005240
NCT03338647	CTRI/2014/12/005310
NCT02794337	CTRI/2014/12/005310
NCT02145897	CTRI/2015/01/005355
NCT01889433	CTRI/2015/02/005494
NCT01908400	CTRI/2015/05/005799
NCT03133299	CTRI/2015/06/005844
NCT02350855	CTRI/2015/06/005852
NCT01338324	CTRI/2015/06/005863
NCT02906917	CTRI/2015/08/006139
NCT01138865	CTRI/2015/10/006275
NCT01947062	CTRI/2015/11/006388
NCT03280147	CTRI/2016/04/006810
NCT01635777	CTRI/2016/04/006898
NCT03230058	CTRI/2016/07/007103
NCT02240771	CTRI/2016/08/007161
NCT02265328	CTRI/2016/08/007178
NCT03420144	CTRI/2016/09/007301
NCT03289338	CTRI/2016/10/007385
NCT01631890	CTRI/2016/11/007483
NCT01876017	CTRI/2016/11/007489
NCT01479283	CTRI/2017/02/007776
NCT01202383	CTRI/2017/02/007794
NCT03089229	CTRI/2017/05/008636
NCT02964247	CTRI/2017/06/008819
NCT01870128	CTRI/2017/06/008848
NCT01905735	CTRI/2017/06/008848
NCT03130114	CTRI/2017/07/009017
NCT02473341	CTRI/2017/07/009025
NCT02805257	CTRI/2017/07/009089
NCT01974518	CTRI/2017/07/009152
NCT02963766	CTRI/2017/08/009266
NCT02025660	CTRI/2017/08/009327
NCT01857479	CTRI/2017/08/009429
NCT03511261	CTRI/2017/08/009461
NCT02645656	CTRI/2017/08/009461
NCT01834040	CTRI/2017/08/009462
NCT03657394	CTRI/2017/08/009484
NCT02598102	CTRI/2017/09/009926
NCT02329353	CTRI/2017/10/010158
NCT01924104	CTRI/2017/10/010176
NCT01735877	CTRI/2017/10/010184
NCT02738515	CTRI/2017/10/010189
NCT01384565	CTRI/2017/11/010420
NCT02451033	CTRI/2017/11/010420
NCT03807297	CTRI/2017/11/010447
NCT01459328	CTRI/2017/11/010683
NCT01200732	CTRI/2017/12/010736
NCT01575639	CTRI/2017/12/010742
NCT01387841	CTRI/2017/12/010864
NCT03876444	CTRI/2017/12/010877
NCT01286779	CTRI/2017/12/011042
NCT02738541	CTRI/2018/01/011231
NCT03896685	CTRI/2018/01/011298
NCT01958554	CTRI/2018/01/011596
NCT02545413	CTRI/2018/01/011628
NCT01111552	CTRI/2018/02/011662
NCT01111539	CTRI/2018/02/011662
NCT01111565	CTRI/2018/02/011662
NCT01123707	CTRI/2018/02/011662
NCT03004196	CTRI/2018/02/011675
NCT03415698	CTRI/2018/02/011754
NCT02920125	CTRI/2018/02/011848
NCT03638622	CTRI/2018/02/011870
NCT02649335	CTRI/2018/02/012024
NCT02683759	CTRI/2018/02/012148
NCT03822091	CTRI/2018/02/012172
NCT01545050	CTRI/2018/03/012298
NCT03766139	CTRI/2018/03/012377
NCT02512952	CTRI/2018/03/012377
NCT01384578	CTRI/2018/03/012577
NCT01117298	CTRI/2018/03/012720
NCT03396900	CTRI/2018/04/012982
NCT01766323	CTRI/2018/04/013369
NCT03505723	CTRI/2018/04/013379
NCT01246882	CTRI/2018/04/013379
NCT01553981	CTRI/2018/05/013619
NCT02875756	CTRI/2018/05/013646
NCT01259349	CTRI/2018/05/013698
NCT02120872	CTRI/2018/05/013782
NCT02048761	CTRI/2018/05/013782
NCT02800902	CTRI/2018/05/013991
NCT01440621	CTRI/2018/05/014046
NCT03741309	CTRI/2018/05/014136
NCT01338415	CTRI/2018/05/014295
NCT01117402	CTRI/2018/05/014331
NCT03969212	CTRI/2018/06/01453
NCT01217190	CTRI/2018/06/014612
NCT01233258	CTRI/2018/07/014754
NCT01308437	CTRI/2018/07/014759
NCT03548935	CTRI/2018/07/014765
NCT02985099	CTRI/2018/07/014771
NCT03761225	CTRI/2018/07/014823
NCT03026478	CTRI/2018/08/015185
NCT02380989	CTRI/2018/09/015683
NCT01321827	CTRI/2018/09/015843
NCT02924727	CTRI/2018/09/015847
NCT03778229	CTRI/2018/10/015941
NCT01593943	CTRI/2018/10/015988
NCT01291511	CTRI/2018/10/016209
NCT02020668	CTRI/2018/11/016316
NCT01955824	CTRI/2018/11/016328
NCT03533972	CTRI/2018/11/016383
NCT01517022	CTRI/2018/11/016457
NCT01373853	CTRI/2018/12/016584
NCT02030041	CTRI/2018/12/016734
NCT03706690	CTRI/2019/01/017034
NCT01061580	CTRI/2019/01/017251
NCT03136484	CTRI/2019/02/017435
NCT02935881	CTRI/2019/02/017460
NCT02154152	CTRI/2019/02/017485
NCT01337778	CTRI/2019/02/017706
NCT02639572	CTRI/2019/02/017728
NCT02081976	CTRI/2019/02/017728
NCT01488825	CTRI/2019/02/017793
NCT01062308	CTRI/2019/02/017882
NCT03043196	CTRI/2019/03/017924
NCT01154959	CTRI/2019/03/017926
NCT03786380	CTRI/2019/03/01811
NCT03285308	CTRI/2019/03/01811
NCT01276730	CTRI/2019/03/018285
NCT03773978	CTRI/2019/03/018327
NCT01406717	CTRI/2019/04/018494
NCT02979548	CTRI/2019/05/019082
NCT01402024	CTRI/2019/05/019082
NCT03109392	CTRI/2019/05/019109
NCT02161900	CTRI/2019/05/019187
NCT03615924	CTRI/2019/05/019359
NCT03580044	CTRI/2019/06/019884

## Sheet: 25 fuzz samples_manual inspection
Cause for match or mis-match of pairs of trials	NCT Number	CTRI number	Study Type	Type_of_trial	Phases	Phase	Conditions	Condition	Interventions	intervention	Sponsor/Collaborators	Primary_sponsor	Source_of_monetary	Title	Public_title	Scientific_title	Outcome Measures	Primary_outcome	Sites in India	Sites (in India)
Intervention	NCT01977118	CTRI/2018/03/012500	Interventional	Interventional	Phase 2|Phase 3		Acute Pancreatitis	Acute Pancreatitis (Severe and moderately severe),	Drug: streptokinase|Other: Saline irrigation	Early Surgery Arm	Postgraduate Institute of Medical Education and Research	Rajesh Gupta		Use of Streptokinase for Enhancement of Percutaneous Drainage of Pancreatic Necrosis	Clinical trial to assess efficiency of minimally invasive surgery in severe pancreatitis	Early minimally invasive surgery versus extended percutaneous drainage in step-up approach in infected pancreatic necrosis a randomized controlled trial.	Sepsis reversal|Mortality|Length of intensive care unit (ICU) and hospital stay|Proportion of patients requiring surgical necrosectomy|Number and size of catheters required|Number of interventions required|Catheter-related complications|Streptokinase related complications	1.Mortality in the two groups 2. Morbidity in the two groups 3. Duration of hospital stay 4. Proportion of patients who required surgery in group B 5. Proportion of patients who required conventional open necrosectomy in both groups, Till discharge from hospital
Phase	NCT01908400	CTRI/2010/091/000176	Interventional	Interventional	Phase 1|Phase 2	Phase 3	Mental Retardation	AGITATION AND/OR AGGRESSIVENESS IN ADULT AND ELDERLY PATIENTS WITH COGNITIVE IMPAIRMENT (DEMENTIA),	Biological: Intravenous transfer of BMMNC	Tiapride 50mg conventional oral tablets	Chaitanya Hospital, Pune	Intas Pharmaceuticals Limited	Intas Pharmaceuticals Limited	Safety and Efficacy of BMMNCin Patients With Mental Retardation	CLINICAL TRIAL OF TIAPRIDE TO EVALUATE ITS SAFETY AND EFFECTIVENESS IN THE TREATMENT OF AGITATION AND AGGRESSIVENESS IN ADULT AND ELDERLY PATIENTS WITH IMPAIRED HIGHER MENTAL FUNCTIONS	A PROSPECTIVE, PHASE III, RANDOMIZED, OPEN-LABEL, COMPARATIVE, MULTICENTRE CLINICAL TRIAL OF TIAPRIDE TO EVALUATE ITS SAFETY AND EFFICACY IN THE TREATMENT OF AGITATION AND AGGRESSIVENESS IN ADULT AND ELDERLY PATIENTS WITH COGNITIVE IMPAIRMENT	Binet-Kamat Test|Vineland Social Maturity Scale	Number of patients with greater or equal to 25% reduction in MOSES irritability subscale score, At the end of 21-day treatment period compared with baseline
Sponsors and sites different	NCT01172548	CTRI/2017/07/009123	Interventional	BA/BE	Phase 2		Gastrointestinal Stromal Tumors	Adult Patients Suffering from Chronic Myeloid Leukemia or Gastrointestinal Stromal Tumor under Fed Conditions, C921||Chronic myeloid leukemia, BCR/ABL-positive,	Drug: imatinib mesylate	Imatinib mesylate tablets is 400 mg	Novartis Pharmaceuticals|Novartis	Qilu Pharmaceutical Co Ltd	Qilu Pharmaceutical Co Ltd	Safety and Efficacy Evaluation of Two Year Imatinib Treatment in Adjuvant Gastrointestinal Stromal Tumor (GIST)	Comparative evaluation of two formulations of Imatinib Mesylate Tablet 400 mg in Adult Patients Suffering from Cancer under Fed Conditions	A Randomized, Open Label, Two-Treatment, Multiple Dose, Steady State, Two-period, Cross-over, Multi-Centre Comparative Bioequivalence Study of Imatinib Mesylate Tablet 400 mg of Qilu Pharmaceutical (Hai) Co.,Ltd. with gleevec®(Imatinib Mesylate) Tablet 400 mg Distributed by Novartis Pharmaceuticals Corporation, East Hanover, New Jersey 07936 in Adult Patients Suffering from Chronic Myeloid Leukem…	Recurrence Free Survival Rate|Compare Recurrence Free Survival Rate to historical controls|Compare Overall Survival to historical controls|Compare Time To Recurrence to historical controls|Adverse Events|Treatment Compliance - tracking if the patient is coming to visits as per visit schedule in protocol	To characterize pharmacokinetic profile of test product – Imatinib Mesylate tablets compared to that of the corresponding reference product– gleevec® (imatinib mesylate) tablets 400 mg who are diagnosed to have CML or GIST and are presently receiving stable dose of imatinib mesylate tablets 400 mg, and assess their bioequivalence., On days 5 and 12, 1st pre-dose blood sampling within 10 minutes b…	4 sites in India	6 sites, all different
CTRI study lists a different NCT ID as secondary ID	NCT01545050	CTRI/2012/12/003272	Interventional	Interventional	Phase 2	Phase 2	Crohn's Disease	Crohns disease.,	Biological: Placebo matching with BMS-945429|Biological: BMS-945429	Experimental: 5mg BID	Vitaeris INC	Pfizer Limited	Pfizer Limited	Dose Ranging Study of BMS-945429 in Subjects With Moderate to Severe Crohn's Disease	PHASE 2b Study To Evaluate SAFETY AND EFFICACY OF CP-690,550 FOR MAINTENANCE THERAPY IN PATIENTS WITH MODERATE TO SEVERE CROHN’S DISEASE	A PHASE 2b “A RANDOMIZED, DOUBLE-BLIND, PLACEBO-CONTROLLED, PARALLEL GROUP, MULTI-CENTRE STUDY TO INVESTIGATE THE SAFETY AND EFFICACY OF CP-690,550 FOR MAINTENANCE THERAPY IN SUBJECTS WITH MODERATE TO SEVERE CROHN’S DISEASE	Proportion of subjects with clinical remission as measured by the Crohn's Disease Activity Index|Proportion of subjects with clinical response during Induction Period|Change from baseline of Inflammatory Bowel Disease Questionnaire (IBDQ) and Short Form-36 (SF-36)|Safety during the Induction Period as measured by adverse events, vital signs, physical examinations and safety lab values|Immunogenic…	The proportion of subjects maintaining clinical response-100 as defined by a decrease in CDAI score at least 100 points from A3921083 baseline or being in clinical remission as defined by a CDAI score less than 150 at Week 26 At 26 week
Phase	NCT01575639	CTRI/2017/12/010742	Interventional	Interventional	Phase 3	Phase 4	Infantile Spasms|West Syndrome	Infantile spasm patients diagnosedclinicallyand byEEG Age3to18months,	Drug: Oral prednisolone	Tablet Pyridoxine in combination with Inj ACTH	Lady Hardinge Medical College	PGIMER Chandigarh	Special Research Grant byDepartment of Paediatrics	Prednisolone in Infantile Spasms- High Dose Versus Usual Dose	Whether high dose oral pyridoxine as an add on therapy to standard therapy ACTH is safe and efficacious than standard therapy of ACTH alone in the treatment of infantile spasms	Effectiveness and Safety of high dose, Oral Pyridoxine as add on to ACTH versus ACTH therapy for Infantile Spasms A randomised, Open-Label Study	Proportion of children who achieved spasm freedom (for at least 48 hours) as per parental reports on day 14 .|Proportion of children with adverse effects	Proportion of children with Complete cessation of spasms, 14-21 days,42-49 days and 90-104 days
Phase	NCT01834040	CTRI/2018/01/011526	Interventional	Interventional	Phase 1|Phase 2	Phase 3	Muscular Dystrophy|Duchenne Muscular Dystrophy	G710||Muscular dystrophy, Nonsense Mutation Duchenne Muscular Dystrophy,	Other: Intralesional/ Intravenous of Autologous Stem cells.	Ataluren or PTC 124	Chaitanya Hospital, Pune	PTC Therapeutics Inc	PTC Therapeutics	Study Safety and Efficacy of BMMNC for the Patient With Duchenne Muscular Dystrophy	A study of long-term results of Ataluren in Duchenne Muscular Dystrophy	A PHASE 3, RANDOMIZED, DOUBLE-BLIND, PLACEBOCONTROLLED EFFICACY AND SAFETY STUDY OF ATALUREN IN PATIENTS WITH NONSENSE MUTATION DUCHENNE MUSCULAR DYSTROPHY AND OPEN-LABEL EXTENSION	Improvement of daily living scale.|Improvement of Muscular dystrophy specific functional Rating scale	6- Minute Walk Test Time Frame 72 weeks, Time Frame 72 weeks
Sponsors and sites different	NCT02612792	CTRI/2017/08/009386	Interventional	Interventional	Phase 2|Phase 3		Furcation Defects	Chronic periodontitis patients with grade II furcation involvement in mandibular teeth,	Procedure: Open flap debridement (OFD)|Procedure: OFD with Platelet rich fibrin (PRF)|Procedure: OFD with Platelet rich fibrin (PRF)+1.2% Atorvastatin (Drug) in gel form	Grade II Furcation treatment	Government Dental College and Research Institute, Bangalore	Saraswati Dental College Lucknow	Self funded by the investigators	Platelet Rich Fibrin+1.2% Atorvastatin in Treatment of Mandibular Degree II Furcation Defects	Comparative Evaluation of Beta-Tricalcium Phosphate versus Platelet Rich Fibrin in the treatment of Mandibular Furcation Defects	A Comparative Evaluation of the Regenerative Potential of alloplastic material Beta-Tricalcium Phosphate (β-TCP) and Autologous Platelet Rich Fibrin (PRF) in the treatment of Mandibular Furcation Defects A Clinico-Radiographic Study	. Radiographic bone fill assessed in percentage|probing depth measured in mm|Relative vertical attachment level measured in mm|Relative horizontal attachment level measured in mm|modified sulcus bleeding index|plaque index	horizontal clinical attachment level (HCAL), gingival recession (GR), relative vertical height of furcation (r-VHF) and relative horizontal depth of furcation (r-HDF) and radiogaraphic parameters horizontal depth of furcation (H-DOF), vertical height of furcation (V-HOF), Horizontal clinical attachment level (HCAL), gingival recession (GR), relative vertical height of furcation (r-VHF) and relati…	Government Dental College and Research Institute, Bangalore	Sraswati Dental College, Lucknow
Sponsors and sites different	NCT01958554	CTRI/2018/01/011596	Interventional	Interventional	Phase 2		Domestic Violence	All human volunteers fulfilling the inclusion/exclusion criteria can participate	Behavioral: Intervention Group	Ghya Bharaari Ekatra	Macmillan Research Group UK|NMP Medical Research Institute	National Institutes of Health Fogarty International Center	National Institutes of Health Fogarty International Center	Impact of an Integrated Intervention on Mental Health in Survivors of Intimate Partner Violence	Primary Prevention of Intimate Partner Violence in India	Primary Prevention of Intimate Partner Violence in India	Depression|Health Related Quality of Life	Evaluate safety of the developed intervention for primary prevention of intimate partner violence in India, August 2018	Sonal Foundation Mahesana, Gujarat	NARI, ICMR, Pune
Phase	NCT02765503	CTRI/2010/091/000428	Interventional		Phase 3	Phase 1/ Phase 2	Squamous Cell Carcinoma of the Head and Neck	Locally advanced stage III and IV squamous cell carcinoma of larynx and oropharynx,	Radiation: External beam radiotherapy	Hyperfractionated IMRT	International Atomic Energy Agency|Centro de Lucha contra el Cáncer, Montevideo, Uruguay|Institute Rotary Cancer Hospital, New Delhi, India|Tata Memorial Centre|Bahawalpur Institute of Nuclear Medicine and Oncology, Bahawalpur, Pakistan|GKNM Hospital, Tamil Nadu, India|Fundacion Escuela de Medicina Nuclear, Mendoza, Argentina|Instituto de Oncología y Radiobiología, Havana, Cuba|University of Indo…	Chriatian Medical College	Instituitional Research Grant	Resource Sparing Curative Radiotherapy for Locally Advanced Squamous Cell Cancer of the Head and Neck: The HYPNO Trial	PILOT Phase of a trial looking at benefits of Hyperfractionated IMRT in locally advanced head and neck cancer.	PILOT phase of a single arm phase II trial to assess the toxicity and efficacy of hyper-fractionated IMRT (Intensity Modulated Radiotherapy) in radical treatment of locally advanced head and neck squamous cell carcinoma.	Primary tumor control in T and N position|Treatment related late Grade 2+ toxicity (CTCAE 4.0)|Overall survival|Disease free survival|Any other treatment related early and late morbidities (CTCAE 4.0)|EORTC QOL-C30/HN-35 (optional)	To determine whether Hyper fractionated IMRT in locally advanced T3 T4, N0 N+ squamous cell carcinoma of the oropharynx and hypopharynx leads to a reduction in acute toxicity as compared to the historical data from the standard fractionated intensity modulated chemo-radiotherapy., Week 1,2, 3 4 , 5, 6th, 6th week post radiotherapy, 6th month and end of first year
Condition	NCT02451033	CTRI/2012/02/002397	Interventional	Interventional	Phase 2|Phase 3	Phase 3	Cirrhosis	Patients on Myelosuppressive Therapy for Non Myeloid Malignancies,	Drug: standard medical therapy|Drug: G-CSF|Drug: Growth Hormone	Cadila G-CSF	Postgraduate Institute of Medical Education and Research	Cadila Pharmaceuticals Ltd	Cadila Pharmacetutical Ltd 1389	Granulocyte Colony Stimulating Factor And Growth Hormone In Cirrhosis Of Liver: An Open Label Study	Study of GCSF in Patients on Myelosuppresive Therapy for Non-Myeloid Malignancies.	A Phase III Randomized Controlled Open Label Comparative Multicentric Trial To Compare The Safety And Efficacy of Indigenous Recombinant Human Granulocyte Colony Stimulating Factor (rhG-CSF) With Neupogen® In Patients on Myelosuppressive Therapy for Non Myeloid Malignancies.	Transplant free survival|haematopoietic stem cell mobilization|safety as measured by adverse effects of G-CSF, GH and combination in cirrhosis of liver|Clinical/biochemical improvement in liver function profile	Percentage of patients developing febrile neutropenia defined as body temperature 38 2 C or developing a temperature of 38 C twice in a 12-hour period and absolute neutrophil count 5 x 10e9/L on the same day of the fever or the day after 14 days
Phase	NCT01876017	CTRI/2008/091/000257	Interventional	Interventional	Phase 1|Phase 2	Phase 3	Chronic Renal Failure	N189||Chronic kidney disease, unspecified, Maintaining hemoglobin level in chronic renal failure,	Biological: Intravenous transfer of Autologous (BMMNCs)	Vitamin B Complex	Chaitanya Hospital, Pune	Cadila Healthcare Ltd	Cadila Healthcare Ltd	Safety and Efficacy of BMMNC in Patients With Chronic Renal Failure	A clinical trial to study the effects of epoetin in patients with chronic renal failure	A Multicentric, prospective, phase III clinical study to evaluate the efficacy and safety of Zydus Recombinant Human Epoetin Alpha (r-HuEPO) in maintaining haemoglobin level in Chronic Renal Failure (CRF).	Maintain or demonstrate improvement in laboratory values.|pain intensity by VAS|Improvement in SF36(Short form 36) score|Improvement in subjective global assessment|the incident of uremia and dialysis requirement	Change in hemoglobin level from baseline 6 weeks
Sponsors and sites different	NCT03784365	CTRI/2019/06/019819	Interventional	Interventional	Phase 3		Achalasia Cardia	K220||Achalasia of cardia,	Drug: 3Rd Generation Cephalosporins	GERD-X group	Asian Institute of Gastroenterology, India	Endoscopy Research Foundation	Endoscopy Research Foundation	Single-Versus Multiple-dose Antimicrobial Prophylaxis for Peroral Endoscopic Myotomy in Achalasia	Endoscopic Full Thickness Plication for esophageal abnormal acid exposure post Peroral endoscopic myotomy	A randomised study comparing Endoscopic Full Thickness Plication (GERD-X) vs. Sham for esophageal abnormal acid exposure post Peroral endoscopic myotomy in patients with achalasia cardia	estimate the % of bacteremia associated with POEM.	Improvement of abnormal acid exposure by 24 hr ph study, 1 month	Hyderabad	Baldota Institute of Digestive Sciences, Mumbai
Sponsors and sites different	NCT02329353	CTRI/2018/12/016565	Interventional	Interventional	Phase 3	Phase 3	Chronic Periodontitis	chronic generalised periodontitis	Drug: Lactobacillus brevis CD2 Lozenges	indocyanine green mediated photodynamic therapy	Next Gen Pharma India Pvt. Ltd.|Krishnadevaraya College of Dental Sciences & Hospital	self sponsered	KRISHGEN BIOSYSTEMS UNIT NOS318 319	Effect of Probiotics on Chronic Periodontitis in Smoker and Non- Smokers	The effect of teeth cleaning and indocyanine green dye and laser therapy on levels of fluid inside the gums in subjects with gum disease who are smokers versus nonsmokers - a comparative study.	The effect of indocyanine green mediated photodynamic therapy on gingival crevicular fluid levels of TNF α and MMP-8 MMP-8 in chronic periodontitis subjects among smokers versus nonsmokers - a comparative study	Improvement in Clinical Periodontal Indices|Change in microbiological indices	To find out the effect of indocyanine green mediated photodynamic therapy on gingival crevicular fluid levels of TNF- and MMP-8 in chronic periodontitis subjects among smokers versus non-smokers To find out the effect of indocyanine green mediated photodynamic therapy on gingival crevicular fluid levels of TNF- and MMP-8 in chronic periodontitis subjects among smokers versus non-smokers	Krishnadevaraya College of Dental Sciences and Hospital, Bangalore	oxford dental college and hospital,KARNATAKA
Phase	NCT03396900	CTRI/2018/11/016450	Interventional	Interventional	Phase 2	Phase 1	Malocclusion	M264||Malocclusion, unspecified,	Drug: RhBMP-2 Protein, Recombinant|Other: Conventional Corticotomy	PRF membrane combined with alloplastic bone graft	SVS Institute of Dental Sciences	Indian Council of Medical Research	Manu Bhaskaran Nair Room no 9 Dept of Periodontology JSS Dental College and Hospital Mysuru 5715	Periodontally Accelerated Osteogenic Orthodontics With BMP2	A study to help in accelerating tooth movement in patients undergoing clip treatment and to check the bone activity of the tooth during the procedure.	Adjunctive effect of PRF membrane on GCF Alkaline Phosphatase levels in patients undergoing Periodontally Accelerated Osteogenic Orthodontics(PAOO)-A Randomized Controlled Trial	Orthodontic treatment duration	To compare the osteoblastic activity in PAOO procedure with PRF membrane Baseline 3 4 5 7 9 15 27 weeks
CTRI has different NCT # as Secondary ID	NCT02924727	CTRI/2012/05/002653	Interventional	Interventional	Phase 3	Phase 3	Acute Myocardial Infarction	Cardiovascular Diseases,	Drug: LCZ696 (sacubitril/valsartan)|Drug: Ramipril|Drug: Placebo of LCZ696|Drug: Placebo of ramipril|Drug: Valsartan|Drug: Placebo of valsartan	AMR101	Novartis Pharmaceuticals|Novartis	Amarin Pharma Inc	Amarin Pharma Inc 143 Route 26	Prospective ARNI vs ACE Inhibitor Trial to DetermIne Superiority in Reducing Heart Failure Events After MI	A study to determine the effectiveness and safety of AMR101 in reducing the risk of cardiovascular events (e.g. stroke, heart attack, unstable angina) in patients with high triglyceride levels and who are on statin treatments.	A Multi-Center, Prospective, Randomized, Double-Blind, Placebo-Controlled, Parallel-Group Study to Evaluate the Effect of AMR101 on Cardiovascular Health and Mortality in Hypertriglyceridemic Patients with Cardiovascular Disease or at High Risk for Cardiovascular Disease: REDUCE-IT (Reduction of Cardiovascular Events with EPA – Intervention Trial)	Time to the first occurrence of a confirmed composite endpoint|Time to the first occurrence of a confirmed composite of CV death or HF hospitalization|Time to the first occurrence of a confirmed composite of HF hospitalization or outpatient HF|Time to the first occurrence of a confirmed composite of CV death, non-fatal spontaneous myocardial infarction or non-fatal stroke|Total number of recurren…	Composite endpoint of CV death MI stroke coronary revascularization and hospitalization for unstable angina 4-6 years
Condition	NCT01202383	CTRI/2017/05/008688	Interventional	Interventional	Phase 3	Phase 3	Diarrhoea	Patients having Neuropathic Pain,	Behavioral: Household-based water treatment with NADCC tablets|Behavioral: Household-based water treatment with placebo tablets	Fixed Dose Combination of Pregabalin Amitriptyline	London School of Hygiene and Tropical Medicine|Population Services International|Partners for Affordable Technologies in Health|United States Agency for International Development (USAID)|Chemical Council of America|Medentech|Indian Institute of Health Management Research	Sun Pharma Laboratories Limited	Sun Pharma Laboratories Limited	Double-blinded Trial of Household-based Chlorination in India	A clinical trial to study the efficacy and safety of combination drugs of Pregabalin and Amitriptyline in comparison to single therapy of Pregabalin and Amitriptyline in patients having Neuropathic Pain in India.	A randomised multi-centric double blinded comparative study to evaluate efficacy and safety of fixed dose combination of Pregabalin and Amitriptyline in comparison to monotherapy of Pregabalin and Amitriptyline in patients having Neuropathic Pain in India	diarrhoea morbidity|weight for age Z-score|bacteriological water quality in household storage container|residual chlorine in household storage container|absenteeism from school and work|health care expenditure for diarrhea	Change in Numeric Rating Scale NRS from baseline to 12 weeks 12 weeks
Intervention	NCT01553981	CTRI/2016/02/006617	Interventional	Interventional	Phase 3	Phase 3	Lung Diseases, Interstitial	Systemic Sclerosis Associated Interstitial Lung Disease,	Drug: Tadalafil|Drug: Placebo	Nintedanib	Sanjay Gandhi Postgraduate Institute of Medical Sciences	Boehringer Ingelheim India Private Limited	Boehringer Ingelheim India Private Limited	A Trial of Tadalafil in Interstitial Lung Disease of Scleroderma	A Trial to Compare Nintedanib With Placebo for Patients With Scleroderma Related Lung Fibrosis	A Double Blind, Randomised, Placebo-controlled Trial Evaluating Efficacy and Safety of Oral Nintedanib Treatment for at Least 52 Weeks in Patients With Systemic Sclerosis Associated Interstitial Lung Disease (SSc-ILD)	Change in FVC (expressed as a percentage of the predicted value)|Improvement in dyspnoea (as measured by Mehler dyspnoea index)|Improvement in 6 min walk test|change in DLCO|change in total lung capacity|change in the disability index of the Health Assessment Questionnaire (S HAQ)|change in the Medical Outcomes Study 36-item Short-Form General Health Survey (SF-36)scores	Annual rate of decline in FVC in mL over 52 weeks Annual rate of decline in FVC in mL over 52 weeks
Condition	NCT01958177	CTRI/2007/091/000003	Interventional	Interventional	Phase 1|Phase 2	Phase 2	Cerebellar Ataxia	Moderate to severe Psoriasis,	Biological: Intravenous transfer of of Bone Marrow derived Mono Nuclear Stem Cell (BMMNCs)	SPHIRA	Chaitanya Hospital, Pune	Nicholas Piramal Research Center	Nicholas Piramal Research Center	Clinical Study to Evaluate the Safety and Efficacy BMMNC in Cerebellar Ataxia	A clinical trial to study safety and efficacy of 2 doses of SPHIRA compared to placebo in patients of psoriasis	Randomized, Double Blind, Placebo Controlled, Pilot Study To Evaluate The Safety And Efficacy of 2 doses of SPHIRA in subjects with Moderate to Severe Psoriasis	improve in INTERNATIONAL CO-OPERATIVE ATAXIA RATING SCALE|Balance test|Tremor Rating Scale|quality of life	PASI score- change in PASI score at V4 wk 12 compared to baseline Physician s Global Assessment PGA - Change in PGA at V2 wk 4 V3 wk 8 and V4 wk12 early termination visit compared to baseline Photograph of the target lesion 3 months
Condition	NCT01984814	CTRI/2014/11/005231	Interventional	Interventional	Phase 2	Phase 1/ Phase 2	Amyotrophic Lateral Sclerosis	Multiple Sclerosis,	Biological: Stem cell	Mesenchymal stem cells	Neurogen Brain and Spine Institute	Department of Biotechnology	Applied to Department of Biotechnology	Stem Cell Therapy for Amyotrophic Lateral Sclerosis	Stem Cell injection in Multiple Sclerosis patients	Study of Safety, Feasibility and Efficacy of Autologous Mesenchymal Stem Cells in Multiple Sclerosis	Duration of survival	safety and efficacy end points. The safety end points would include measurement of serious adverse events i.,e mortality, occurrence of relapse (number and frequency of events). Laboratory assessments like complete hemogram, liver and kidney function tests, immunology profile C3 , IgA IgM, day 2, one week, 3, 6 and 12 months
Intervention	NCT02738515	CTRI/2017/04/008327	Interventional	Interventional	Phase 2|Phase 3		Chronic Periodontitis With Mandibular Degree 2 Furcation Defects	Grade II furcation defect in permanent mandibular molars,	Drug: 0.75 % Boric Acid|Drug: placebo	periosteal membrane	Government Dental College and Research Institute, Bangalore	shivesh mishra	ITS Dental college	Boric Acid in Degree 2 Furcation Defect	Study to see if Periosteal membrane is a better clinical choice than available collagen membrane in the management of Grade II furcation involved teeth	Comparison of periosteal membrane with commercially available collagen membrane in the treatment of mandibular Grade II furcation defect A split mouth study	Radiographic bone fill|probing depth|Relative vertical attachment leve|Relative horizontal attachment level|modified sulcus bleeding index|plaque index	Horizontal furcation measurement and radiographic bone defect level, baseline and 6 months
Phase	NCT03028740	CTRI/2019/01/017014	Interventional	Interventional	Phase 3	Phase 2	Nonalcoholic Steatohepatitis	K70-K77||Diseases of liver,	Drug: Cenicriviroc|Drug: Placebo	ARM D Tropifexor LJN452 Cenicriviroc CVC	Tobira Therapeutics, Inc.	Novartis Healthcare Private Limited	Novartis Pharma AG	AURORA: Phase 3 Study for the Efficacy and Safety of CVC for the Treatment of Liver Fibrosis in Adults With NASH	It is a combined treatment of Tropifexor (CLJN452) & Cenicriviroc (CVC) in adult patient having Nonalcoholic fatty liver disease (NAFLD)& formation of an abnormal amount of fibrous tissue in Liver for assessing Safety, Tolerability & effectiveness.	A Randomized, Double-blind, Multicenter Study to Assess the Safety, Tolerability, and Efficacy of a Combination Treatment of Tropifexor (LJN452) and Cenicriviroc (CVC) in Adult Patients With Nonalcoholic Steatohepatitis (NASH) and Liver Fibrosis	Superiority of CVC compared to placebo on liver histology at Month 12 relative to the Screening biopsy|Superiority of CVC compared to placebo on the composite endpoint of histopathologic progression to cirrhosis, liver-related clinical outcomes, and all-cause mortality|Effect of CVC compared to placebo on liver histology at Month 60 relative to the Screening biopsy for the proportion of subjects …	Number of participants with Adverse Events Occurrence of adverse events and serious adverse events 48 Weeks
Sponsors and sites different	NCT01154959	CTRI/2011/05/001745	Interventional	Interventional	Phase 3	Phase 3	Pulmonary Tuberculosis	Treatment naive Tuberculosis patient,	Drug: Moxifloxacin, Isoniazid, Rifampicin Pyrazinamide, Ethambutol	Moxifloxacin in combination with Isoniazid	Tuberculosis Research Centre, India|National Institutes of Health (NIH)	Apothecaries Private limited	Global Alliance for TB Drug Development	Latency in Pulmonary Tuberculosis	A trial comparing two treatment shortening regimens with the standard anti tuberculosis treatment regimen for the treatment of adults with pulmonary tuberculosis	A randomised placebo controlled double blind trial comparing two treatment shortening regimens with the standard regimen (two months ethambutol, isoniazid, rifampicin and pyrazinamide followed by four months isoniazid and rifampicin) namely 1) two months moxifloxacin, isoniazid, rifampicin and pyrazinamide followed by two months moxifloxacin, isoniazid and rifampicin and 2) two months ethambutol,…	The immune response to crude antigens - PPD and CFA and defined antigens - ESAT-6 and CFP-10 as well as positive controls- SEB and anti-CD3.|Determining the correlation of increase in regulatory factors with the development of relapse in treated TB patients.	Efficacy: Combined failure of bacteriological cure and relapse within one year of completion of therapy as defined by culture using solid media Safety: Both comparisons: Proportion of patients with grade 3 or 4 adverse events 5 years	Tuberculosis Research Centre, Chennai	30 sites, all different
Sponsors and sites different	NCT01246882	CTRI/2019/04/018688	Interventional	Interventional	Phase 3		Stroke	O||Medical and Surgical,	Behavioral: Augmented activity feedback|Behavioral: Speed-only feedback	Cardiac Rehabilitation	University of California, Los Angeles|National Taiwan University Hospital|Washington University School of Medicine|University of Vigo|Morinomiya Hospital, Osaka, Japan|Mayo Clinic|IRCCS San Camillo, Venezia, Italy|Fairlawn Hospital, Worcester, MA, USA|Chonnam National University Hospital|Ain Shams University|MedStar National Rehabilitation Network|St. Luke's Hospital, Pennsylvania|Father Muller M…	Niramayee Prabhu	Department of Physiotherapy	Stroke Inpatient Rehabilitation Reinforcement of ACTivity	Cardiac rehabilitation post cardiac surgeries	Influence of Home based Phase II Cardiac rehabilitation on Functional Capacity and Physical Activity post coronary revascularization	Gait speed|Distance walked in 3 minutes	Functional Capacity, 2 points- at the time of discharge and after 6 weeks for review	Father Muller Medical College, Karnataka	Kasturba Hospital, Udupi
Sponsors and sites different	NCT01387841	CTRI/2018/10/015927	Interventional	Interventional	Phase 2		Breast Cancer|Malignant Female Reproductive System Neoplasm|Lymphomas|Chemotherapy-induced Nausea and Vomiting	D098||Carcinoma in situ of other specified sites,	Behavioral: yoga|Behavioral: Jacobsons PMRT group	Foot Massage group	Bharath Charitable Cancer Hospital and Institute|Bangalore Institute of Oncology|CENTRAL COUNCIL FOR RESEARCH IN YOGA AND NATUROPATHY	Cluny Asha	Self funded	Effect of Yoga in Reducing Chemotherapy Induced Nausea and Vomiting	A study to identify the effect of foot massage in reducing nausea and vomiting among newly diagnosed patients undergoing chemotherapy in RCC, JIPMER.	Effect of foot massage on patients with chemotherapy induced nausea and vomiting (CINV) in RCC, JIPMER.	Effect of yoga on chemotherapy induced nausea and vomiting|Quality of life after chemotherapy	patients will have reduction in nausea, vomiting and retching during chemotheray after the foot massage, 48 hours	Health Care Global Bangalore	JIPMER. Puducherry-06
Phase	NCT03003624	CTRI/2018/10/016166	Interventional	Observational	Phase 3	Phase 4	Periodontitis	Diabetic patients,	Device: Colorado® microdissection needle|Device: Cautery tip|Device: BP blade		SVS Institute of Dental Sciences	Department of Ophthalmology	Department of Ophthalmology	Comparing the Outcomes of Incisions Made by Colorado® Microdissection Needle	A comparative study of tear film tests in diabetic and non-diabetic patients.	A comparative study of tear film tests in diabetic and non-diabetic patients-a cross-sectional study.	Quantity of blood loss in ml|PPD in mm|Changes in dimensions of interdental papilla in mm|Assessment of postoperative pain:|Assessment of wound healing:	The results of the tests like - Schimer’s test, 1)Tear film break up time , 2)Tear meniscus height 3)blink rate and 4) DEWS grading, 9 months

## Sheet: 25 tfidf samples_manual inspection
Cause for match or mis-match of pairs of trials	NCT number	CTRI number	Study Type	Type_of_trial	Phases	Phase	Conditions	Condition	Interventions	intervention	Sponsor/Collaborators	Primary sponsor	Title	Public_title	Scientific_title	Outcome Measures	Primary_outcome	Sites in India	Sites (in India)
Sponsors and sites different	NCT03799809	CTRI/2009/091/000387	Interventional	Interventional	Phase 2|Phase 3	Phase 3	Aspergilloma	Aspergillosis ,	Drug: Intrabronchial Voriconazole instillation	Voriconazole and Anidulafungin Experimental Combination therapy with voriconazole and anidulafungin	All India Institute of Medical Sciences, New Delhi	Pfizer Limited, Pfizer Limited	Efficacy of Intrabronchial Voriconazole Instillation for Inoperable Pulmonary Aspergilloma	Anidulafungin Plus Voriconazole Versus Voriconazole For The Treatment Of Invasive Aspergillosis	A Prospective, Randomized Trial Comparing The Efficacy Of Anidulafungin And Voriconazole In Combination To That Of Voriconazole Alone When Used For Primary Therapy Of Proven Or Probable Invasive Aspergillosis	To compare the percentage of patients achieving reduction in hemoptysis in intrabronchial voriconazole with standard medical therapy group vs standard medical therapy alone for inoperable pulmonary aspergilloma at 3 months.|To compare the percentage of patients who have complete cessation of hemoptysis after 3 months.|To compare the percentage of patients having recurrence of hemoptysis during 3 …	The primary endpoint is all cause mortality, measured 6 weeks after IA initiation of study drug in subjects with proven or probable IA, 6 weeks after IA initiation	All India Institute of Medical Sciences New Delhi, Delhi, India	Sahyadri Speciality Hospital , Pune
Intervention	NCT02413268	CTRI/2009/091/000838	Interventional		Phase 3		Total Atherosclerotic Occlusion of Radial Artery	All patient will have standard indications for coronary angiography. All patients would be Allens test positive and suitable for radial angiography,	Drug: Nitroglycerin	nicorandil	Total Cardiovascular Solutions	Kokilaben Dhirubhai Ambani Hospital and Medical Research Institute, Kokilaben Dhirubhai Ambani Hospital and Medical Research Institute	Topical Nitroglycerin To Prevent Radial Artery Occlusion After Transradial Access: NTP-RAO Trial	A clinical Trial to study effects of two drugs nitroglycerine plus diltiazem and Nicorandil used to prevent contraction of your artery in the arm during the angiography when radial artery is used for Cathetarisation.	To compare the efficacy and side effects of intra radial artery bolus of nicorandil over a combination of nitroglycerine and diltiazem in transradial catheterization.	Radial Artery Occlusion|Headache|Hypotension	The radial artery diameters immediately post sheath insertion and after the antispasmodics will be measured at 3 different levels using standard automated QCA . The vasodilatory response will be calculated as the percentage increase between the pre and post medication diameters, taking the mean of the three values. We will finally compare the change in the vasodilatory reponse between the two gro…
Condition	NCT02867865	CTRI/2013/03/003497	Interventional	Interventional	Phase 2|Phase 3	Phase 2	Gall Bladder Cancers	Localized Esophageal cancer ,	Drug: Gemcitabine|Drug: Cisplatin|Radiation: Chemoradiation|Procedure: PETCECT|Procedure: Laparoscopy	Neoadjuvant Chemotherapy	Tata Memorial Hospital	Tata MemorialHospital, Tata Memorial Hospital	Perioperative Therapy Preoperative Chemotherapy Versus Chemoradiotherapy in Locally Advanced Gall Bladder Cancers	A study comparing preoperative chemotherapy with preoperative chemoradiotherapy for advanced esophageal (foodpipe) cancer	Phase II randomized trial comparing neoadjuvant chemotherapy and neoadjuvant chemoradiotherapy for locoregionally advanced esophageal cancer	Overall Survival|Surgical resection rate|Progression free survival|Number of participants with treatment related serious adverse events|Deterioration free rate of quality of life (QOL) scores at baseline and three monthly	Response rates CR PR in the two groups Not Applicable
Type of study	NCT02770807	CTRI/2013/10/004088	Interventional	Observational	Phase 3		Nervous System Disease|Genetic Syndrome	Ataxia (including Ataxia Telangiectasia),	Drug: EDS-EP dose range of ~5-10 mg DSP/infusion|Drug: EDS-EP dose range of ~14-22 mg DSP/infusion|Drug: Placebo		Erydel	Erydel SPA, Erydel SPA URBINO (PU) Via Sasso 36 61029 - Italy	EDS in Ataxia Telangiectasia Patients	Validation of International Cooperative Ataxia Rating Assesment Scale in younger age group of patients with ataxia and to develop a rating scale for patients with Ataxia Telangiectasia	Applicability of the International Cooperative Ataxia Rating Scale (ICARS) in younger patients and development of global rating instruments for patients with Ataxia Telangiectasia (AT)	Modified International Cooperative Ataxia Rating Scale (mICARS)|Clinical Global Impression of Change (CGI-C) key secondary outcome measure|Clinical Global Impression of Severity (CGI-S) of neurological symptoms of AT|Vineland Adaptive Behavior Scales (VABS)
Type of study	NCT01958177	CTRI/2013/10/004088	Interventional	Observational	Phase 1|Phase 2		Cerebellar Ataxia	Ataxia (including Ataxia Telangiectasia),	Biological: Intravenous transfer of of Bone Marrow derived Mono Nuclear Stem Cell (BMMNCs)		Chaitanya Hospital, Pune	Erydel SPA, Erydel SPA URBINO (PU) Via Sasso 36 61029 - Italy	Clinical Study to Evaluate the Safety and Efficacy BMMNC in Cerebellar Ataxia	Validation of International Cooperative Ataxia Rating Assesment Scale in younger age group of patients with ataxia and to develop a rating scale for patients with Ataxia Telangiectasia	Applicability of the International Cooperative Ataxia Rating Scale (ICARS) in younger patients and development of global rating instruments for patients with Ataxia Telangiectasia (AT)	improve in INTERNATIONAL CO-OPERATIVE ATAXIA RATING SCALE|Balance test|Tremor Rating Scale|quality of life
Phase	NCT03484507	CTRI/2013/11/004139	Interventional	Interventional	Phase 2	Phase 3	Acanthamoeba Keratitis	Diabetic foot ulcer,	Drug: Chlorhexidine|Drug: Povidone-Iodine|Drug: Prednisolone Sodium Phosphate|Drug: Hydroxypropyl Methylcellulose	Individualized homoeopathic medicine with ulcer dressing using Calendula Q	Francis I. Proctor Foundation|Research to Prevent Blindness	Central Council of Research in Homoeopathy, Central Council of Research in Homoeopathy	Parasitic Ulcer Treatment Trial Pilot	Homoeopathic intervention in diabetic foot ulcer	Individualized Homoeopathic intervention in Diabetic Foot Ulcer: a Randomised controlled pilot study using Calendula Q vs normal saline for ulcer dressing	Trial 1: Microbial clearance|Trial 2: Best spectacle corrected visual acuity|Trial 1: Best spectacle corrected visual acuity|Trial 1: Time to re-epithelialization|Trial 1: Clinical cure|Trial 2: Time to clinical cure	Complete closure or epithelialisation within 20 weeks of treatment Complete closure or epithelialisation within 20 weeks of treatment
Condition	NCT02124473	CTRI/2014/05/004591	Interventional	Interventional	Phase 2	Phase 1/ Phase 2	Hypertension, Resistant to Conventional Therapy	Cancer,	Other: Homeopathy|Other: Placebo	Individualized homeopathic medicines in 50 millesimal potencies	Macmillan Research Group UK|NMP Medical Research Institute	Mahesh Bhattacharyya Homeopathic Medical College and Hospital, Mahesh Bhattacharyya Homeopathic Medical College and Hospital	Addition of Homeopathy in Patients With Resistant Arterial Hypertension	Homeopathy in cancer	Individualized homeopathy as additive to standard care in cancer patients an open observational pilot study	Daytime systolic and diastolic pressure|24-hour systolic and diastolic BP	Functional Assessment of Cancer Therapy - General (FACT-G)and Functional Assessment of Chronic Illness Therapy - Spiritual Wellbeing (FACIT-Sp), 6 months
Secondary IDs the same, BCD-022-02	NCT01764022	CTRI/2014/07/004722	Interventional	Interventional	Phase 3	Phase 3	Human Epithelial Receptor (HER)-2 Positive Breast Cancer	Patients with HER2-positive metastatic breast cancer.,	Drug: Trastuzumab|Drug: Paclitaxel	BCD-022 trastuzumab manufactured by CJSC BIOCAD	Biocad	BIOCAD INDIA PVT LTD, BIOCAD INDIA Pvt Ltd	A Safety and Efficacy Study of BCD-022 With Paclitaxel Compared to Herceptin With Paclitaxel in HER2+ Metastatic Breast Cancer Patients	Phase III clinical trial comparing safety and efficacy of BCD-022 (CJSC BIOCAD, Russia) used with paclitaxel to Herceptin® used with paclitaxel in the first-line treatment of HER2 positive metastatic breast cancer patients.	Multicenter randomized double blind phase III clinical trial comparing safety and efficacy of BCD-022 (CJSC BIOCAD, Russia) used with paclitaxel to Herceptin® (F. Hoffmann-La Roche Ltd, Switzerland) used with paclitaxel in the first-line treatment of HER2-positive metastatic breast cancer patients.	Overall Response Rate|Area Under the Curve After the First Test Drug Administration|Complete Response Rate|Partial Response Rate|Stabilization Rate|Progression Rate|Treatment Postponed Due to AE/SAE|Treatment Discontinuation Due to AE/SAE|Occurrence of Neutralizing Anti-trastuzumab Antibodies|Cmax After the First Test Drug Administration|Tmax After the First Test Drug Administration|T1/2 After th…	The therapy efficacy will be evaluated using contrast-enhanced computed tomography CT data The efficacy analysis will include all randomized evaluable patients ITT intent-to-treat analysis Contrast-enhanced CT will be performed at screening after 3 therapy cycles 21 3 days after 3rd administration of investigational product and after 6 therapy cycles 21 3 days after 6th administration of investig…
Phase	NCT01279135	CTRI/2014/08/004819	Interventional	Interventional	Phase 3	Phase 2	Cancer Cervix	Biopsy proven squamous carcinoma, adenocarcinoma or adeno-squamous carcinoma of cervix, FIGO stage IB- IV A undergoing chemoradiation.,	Radiation: Conventional Radiation|Radiation: Tomotherapy based IGRT	Zinc supplementation 40mg/day starting from one week prior to treatment until completion of treatment	Tata Memorial Hospital		Tomotherapy vs Conventional Radiation for Adjuvant Pelvic RT in Ca Cervix	A study to evaluate role of Zinc in decreasing radiation induced diarrhea in patients of carcinoma cervix undergoing pelvic radiotherapy.	A Prospective study to evaluate role of Zinc in decreasing morbidity from diarrhea resulting from pelvic radiation in patients of carcinoma cervix.	Late Grade II-IV bowel toxicity|To identify small bowel dose volume characteristics that predict for Grade II-IV late toxicity|To identify preoperative functional imaging features that predict for local recurrence|To compare quality of life between Tomotherapy vs conventional radiotherapy	To assess acute gastro-intestinal toxicity during and at treatment completion Weekly during radiation treatment At completion of treatment 41/2 to 5 weeks from onset of radiotherapy
Condition	NCT01346566	CTRI/2014/10/005097	Interventional	Interventional	Phase 3		Lens Subluxation	patients in diabetic ketoacidosis,	Device: Cionni Modified Capsule Tension Ring		Iladevi Cataract and IOL Research Center	Post graduate institute of medical education and research Chandigarh, PGIMER	Prospective Study of Cionni Ring and In-the-bag IOL Implantation for Subluxated Lenses	A comparative study to see the benefits of two bag treatment fluid over one bag system in children with severe diabetes	A Randomized controlled trial of one bag vs two bag system of fluid delivery in children with diabetic ketoacidosis - a pilot study	IOL Centration|Complications|IOP|Posterior Capsule Opacification	dextrose. any change in dextrose concentration needed will be done in the same bag or replacement of the bag in steps of 2.5
Phase	NCT01950611	CTRI/2014/11/005202	Interventional	Interventional	Phase 2	Phase 3	Relapsed Acute Promyelocytic Leukemia	C920||Acute myeloblastic leukemia, They have one of the forms of acute myeloid leukaemia as defined by the WHO Classification excluding APML,	Drug: Bortezomib	ADE chemotherapy Ara-c A 200 mg/sqm day 1 to day 10 twice daily as intravenous bolus for first induction and 200 mg/sqm/day	Christian Medical College, Vellore, India	Cancer Institute WIA, Cancer Institute	Proteasome Inhibition in Acute Promyelocytic Leukemia	TRIAL COMPARING EFFECTIVENESS OF TWO STANDARD CHEMOTHERAPY REGIMENS IN TREATMENT OF CHILDHOOD ACUTE MYELOID LEUKEMIA	Randomized Phase III Study Comparing DA (3 plus 7) Versus ADE as Induction Chemotherapy in children with Acute Myeloid Leukemia	Safety|Efficacy	Compare the CR rates between both the regimens in patients with AML aged less than 18 years old Complete remission CR achievement at end of induction chemotherapy Toxicity both haematological and non-haematological at the end of each cycle of chemotherapy Overall survival in both arms at the end of last follow-up
Sponsors and sites different	NCT01908400	CTRI/2015/05/005799	Interventional	Interventional	Phase 1|Phase 2	Phase 2	Mental Retardation	Manasamandata (Mild Mental Retardation),	Biological: Intravenous transfer of BMMNC	Brahma Rasayana	Chaitanya Hospital, Pune	Central Council For Research In Ayurvedic Sciences, Central Council For Research In Ayurvedic Sciences	Safety and Efficacy of BMMNCin Patients With Mental Retardation	A clinical trial to study the effects of a drug named Brahma Rasayan in Patients with Manasamanadata (Mental Retardation)	Clinical Evaluation of Brahma Rasayana in the Management of “Manasamandata (Mental Retardation)” – an open clinical trial.	Binet-Kamat Test|Vineland Social Maturity Scale	Changes in BKT or VSMS Abnormal behavioral test and Parental Perception Evaluation, BKT or VSMS at Base Line, at the end of 3 months and at the end of 6 months ABT at Base line, at the end of 1,2 ,3 ,4 ,5 and 6months Parental perception at the end of 6 months	Chaitanya Hospital, Pune	Advanced Center for Ayurveda in Mental Health and Neuro Sciences, NIMHANS Campus Bangalore
Phase	NCT02906917	CTRI/2015/08/006139	Interventional	Interventional	Phase 3	Phase 4	Diabetes|Diabetes Mellitus, Type 2	Diabetes Mellitus, Type 2, E11||Type 2 diabetes mellitus,	Drug: Insulin degludec/insulin aspart|Drug: Insulin glargine|Drug: Insulin aspart	BIAsp	Novo Nordisk A/S	vo Nordisk AS, Novo Nordisk AS C/O Novo Nordisk India Private Ltd. Plot No.32	A 38 Week Trial Comparing Effect and Safety of Insulin Degludec/Insulin Aspart vs. Insulin Glargine Plus Insulin Aspart in Subjects With Type 2 Diabetes Treated With Basal Insulin With or Without Oral Antidiabetic Treatment in Need of Treatment Intensification	A Study to Compare Insulin Intensification of Biphasic Insulin Aspart 30 and Insulin Analogues (Insulin Glargine and Insulin Aspart) in Insulin naïve Type 2 Diabetic Patients	A 32-week Randomised, Multinational, Treat-to-target, Open Label, Parallel Group Comparison of Stepwise Insulin Intensification of Biphasic Insulin Aspart (BIAsp) 30 and Basal-bolus Therapy With Insulin Glargine and Insulin Aspart in Insulin naïve Type 2 Diabetic Patients Inadequately Controlled on Oral Anti-diabetic Therapy	Change in HbA1c (%) - Week 26|Change in HbA1c (%) - Week 38|Responder (Yes/No) for HbA1c < 7%|Responder (Yes/No) for HbA1c <7% Without Severe or BG Confirmed Symptomatic Hypoglycaemia|Change in FPG|Change in Pre-breakfast SMPG (Used for Titration)|Change in Postprandial SMPG Increment (From 9-point Profile)|Number of Nocturnal, Treatment Emergent Severe or BG Confirmed Symptomatic Hypoglycaemic E…	Change in HbA1c, Week 0, Week 32
Sponsors and sites different	NCT02240771	CTRI/2016/08/007161	Interventional	Interventional	Phase 2|Phase 3	Phase 2/ Phase 3	Hepatocellular Carcinoma	Liver Cancer,	Procedure: Transarterial chemotherapy|Drug: Oral chemotherapy	Arm 1. DEB TACE	All India Institute of Medical Sciences, New Delhi|Indian Council of Medical Research	Tata Memorial Centre Tata Memorial Hospital, Tata Memorial Centre	Transarterial Chemotherapy Compared With Oral Chemotherapy in the Treatment of Advanced Hepatocellular Carcinoma	To compare cause specific survival in control transarterial chemotherapy and transarterial chemotherapy Plus stereotactic body radiation therapy in Hepatocelluar carcinoma	Randomized controlled trial of drug eluting beads based transarterial chemotherapy (TACE) with or without stereotactic body radiation therapy (SBRT) in patients with nonmetastatic unresectable hepatocellular carcinoma.(TACS-RT Study)	Survival rate-|Tumor response	To campare two years overall survival OAS and one year infield progression free survival PFS in control TACE and interventional TACE plus SBRT arm, two years for overall survival OAS and one year for infield progression free survival PFS respectively	AII India Institute of Medical Sciences New Delhi, Delhi, India	ACTREC Tata Memorial Centre Kharghar
Phase	NCT01857479	CTRI/2017/08/009429	Interventional	PMS	Phase 2|Phase 3	Post Marketing Surveillance	Allergic Bronchopulmonary Aspergillosis	J329||Chronic sinusitis, unspecified, The patients with invasive fungal infection who are refractory to or intolerant of conventional Amphotericin B therapy as per physician’s discretion.,	Drug: Inhaled budesonide|Drug: Inhaled amphotericin	Inj. Liposomal Amphotericin B (Phosome) 50 mg	Postgraduate Institute of Medical Education and Research	Cipla Ltd, Cipla Ltd.	A Randomized Controlled Trial of Inhaled Amphotericin B for Maintaining Remission in Allergic Bronchopulmonary Aspergillosis	An observational study to evaluate the safety and tolerability of Amphotericin B Lipid suspension in patients with Invasive Fungal Infections.	An observational, practice based, open label, prospective, non-comparative, multicenter, post marketing surveillance to assess safety and tolerability of Liposomal Amphotericin B (Phosome) in patients with Invasive Fungal Infection who are refractory to or intolerant of conventional Amphotericin B therapy.	Time to first relapse|ACQ-7 scores between the two groups|Number of asthma exacerbations requiring oral steroids|Improvement in forced expiratory volume in the first second (FEV1)|Adverse effects of therapy in both the arms	Safety Endpoints 1.Adverse events and relevant abnormal laboratory findings (serious/non-serious, expected/unexpected, related/non-related). 2.Percentage of patients with adverse events. 3.Treatment discontinuation rates Early discontinuation, discontinuation due to adverse events., During the treatment period.
Condition	NCT03657394	CTRI/2017/08/009484	Interventional	Interventional	Phase 3		Hypoxic-Ischemic Encephalopathy	Anemia in newborn,	Other: Umbilical cord milking	UMBILICAL CORD MILKING GROUP(UCM)	Nemours Children's Clinic|NKPSIMS, Nagpur, India|Sharp HealthCare	Arpita, King Georges Medical University	Umbilical Cord Milking in Neonates Who Are Depressed at Birth	The effects of umbilical cord squeezing in newborn babies requiring some form of intervention to help and support breathing at birth.	The effects of umbilical cord milking in neonates requiring resuscitation at birth a randomized controlled trial	Moderate to severe HIE or death|NICU Admission|Neurological examination at discharge|MRI of the brain	haemoglobin and Hct, at birth and 6 weeks of age
Sponsors and sites different	NCT03876444	CTRI/2017/12/010877	Interventional	Interventional	Phase 2|Phase 3		Infantile Spasm	West syndrome,	Drug: Intravenous Methylprednisolone|Drug: Oral Pednisolone	Methylprednisolone	Suvasini Sharma|Lady Hardinge Medical College	Sanjiv Nanda, Department of Pediatrics, Pt B D Sharma PGIMS, Rohtak, Haryana-124001	Intravenous Methylprednisolone Versus Oral Prednisolone for Infantile Spasms	Effect of methylprednisolone when compared to oral prednisolone in treatment of children with West syndrome	Pulse methylprednisolone versus oral prednisolone for treatment of children with West syndrome An open labelled randomized controlled trial	Proportion of children who achieved spasm freedom as per parental reports in both the groups|Number of days after initiation of trial treatment on which spasms were not seen and after which response was maintained until 6 weeks (day 42) of treatment in both the groups|Proportion of children who achieve resolution of hypsarrhythmia on electro encephalogram at 2 weeks (in all cases) and at 6 weeks …	Proportion of children with cessation of spasm, 4 weeks	Lady Hardinge Medical College, New Delhi	PT B D SHARMA PGIMS, Rohtak, Haryana
Sponsors and sites different	NCT01246882	CTRI/2018/04/013379	Interventional	Interventional	Phase 3		Stroke	Adult patients with ischemic stroke,	Behavioral: Augmented activity feedback|Behavioral: Speed-only feedback	Ayurveda Treatment	University of California, Los Angeles|National Taiwan University Hospital|Washington University School of Medicine|University of Vigo|Morinomiya Hospital, Osaka, Japan|Mayo Clinic|IRCCS San Camillo, Venezia, Italy|Fairlawn Hospital, Worcester, MA, USA|Chonnam National University Hospital|Ain Shams University|MedStar National Rehabilitation Network|St. Luke's Hospital, Pennsylvania|Father Muller M…	Indian Council of Medical Research, Indian Council of Medical Research V. Ramalingaswami Bhawan P.O. Box No. 4911 Ansari Nagar New Delhi - 110029	Stroke Inpatient Rehabilitation Reinforcement of ACTivity	Ayurvedic treatment in the rehabilitation of ischemic stroke	Ayurvedic treatment in the rehabilitation of ischemic stroke patients in India A Randomized Controlled Trial	Gait speed|Distance walked in 3 minutes	Sensorimotor Recovery - measured using Fugl Meyer Assessment Scale, Baseline, One month, Three Month	Father Muller Medical College Karnataka	3 sites in Kerala, Punjab
Phase	NCT02048761	CTRI/2018/05/013782	Interventional	Interventional	Phase 2	Phase 3/ Phase 4	Intrabony Defects in Chronic Periodontitis	Intra-bony defects,	Drug: Placebo gel|Drug: 1 % Metformin gel	1.2	Government Dental College and Research Institute, Bangalore	kommula mani megha, Department of periodontics	Locally Delivered 1% Metformin Gel in the Treatment of Intrabony Defects in Chronic Periodontitis	A clinical study to evaluate the effect of drug simvastatin in treatment of jaw bone defects in between the teeth.	Efficacy of locally delivered simvastain combined with autologous platelet rich fibrin in treatment of intrabony defects A Randomized control clinical trial.	Defect depth reduction|Probing depth|Clinical attachment level|Modified sulcular bleeding index|Plaque index	Simvastatin gel, 1.2
Sponsors and sites different	NCT01955824	CTRI/2018/11/016328	Interventional	Observational	Phase 2|Phase 3		Lung Cancer|Tuberculosis|Sarcoidosis|Interstitial Lung Disease	J00-J99||Diseases of the respiratory system,	Drug: 1% lignocaine|Drug: 2% lignocaine		Postgraduate Institute of Medical Education and Research	Kasturba Medical College Manipal, Dr Keerthi N S Deparment of respiratory medicine	A Trial on Clinical Efficacy of 1% Versus 2% Lignocaine in Cough Suppression and Pain Relief in Patients Undergoing Flexible Bronchoscopy	Patients’ comfort during Flexible Bronchoscopy	Factors affecting patients’ comfort during Flexible Bronchoscopy with and without sedation	Cough suppression (by Operator and Patient)|Pain control	1.Visual Analogue Scale for assessing patients’ Anxiety before Flexible Bronchoscopy 2.Depression Anxiety Stress Scales 21(DASS21)11 3.Visual Analogue Scale for assessing patients’ Discomfort by Flexible Bronchoscopy 4.Post Bronchoscopy questionnaire, patients will be assessed 12 hrs before and 2 hours after bronchoscopy	PGIMER Chandigarh,	Kasturba Medical College And Hospital , Udupi
Sponsors and sites different	NCT02935881	CTRI/2019/02/017460	Interventional	Interventional	Phase 3		GERD	C39||Maligt neoplasm of other and ill-defined sites in the respiratory system and intrathoracic organs,	Device: Radio Frequency Ablation (RFA) (Stretta Procedure)|Procedure: Sham Procedure	Intercostal RadioFrequency Ablation	Asian Institute of Gastroenterology, India	All India Institute of Medical SciencesNew Delhi, All India Institute of Medical SciencesNew Delhi	STRETTA ,Radio Frequency Ablation (RFA) v/s Sham Therapy for the Treatment of Refractory GERD	Effectiveness of Intercostal Radio Frequency Ablation for the Management of Chronic pain after thoracic surgery	Efficacy of Intercostal Radio Frequency Ablation (IC-RFA) for the Management of Chronic Post-Thoracotomy Pain syndrome (PTPS)	Number of patients who report improvement in Quality of Life (QOL) post Stretta procedure as compared to Sham therapy.|Number of patients who report independence from Proton Pump Inhibitor (PPI) drug post Stretta procedure as compared to Sham therapy.|Comparison of Increased Lower Esophageal Sphincter pressure among patients post Stretta procedure & Sham Therapy.	lignocaine will be administered at 3 spaces. One at the site of thoracotomy, one above and one below the level of thoracotomy. It will be followed by pulsed RFA with 42degree for 5 minutes at the same 3 sites	Asian insititute of gastroenterology somajiguda, hyderabad	AIIMS, NEW DELHI
CTRI provides same CTG secondary ID	NCT03383146	CTRI/2019/03/018134	Interventional	Interventional	Phase 3	Phase 3	Gastroparesis|Diabetes Mellitus	E106||Type 1 diabetes mellitus with other specified complications, E116||Type 2 diabetes mellitus with other specified complications,	Drug: Relamorelin|Drug: Placebo	Relamorelin	Allergan	Allergan, Allergan Sales	A Safety and Efficacy Study of Relamorelin in Diabetic Gastroparesis Study 04	A Safety and Efficacy Study of Relamorelin in Diabetic Gastroparesis Study 04	A 52-week, Randomized, Double-blind, Placebo-controlled, Phase 3 Study to Evaluate the Safety and Efficacy of Relamorelin in Patients with Diabetic Gastroparesis	Percentage of patients meeting the diabetic gastroparesis symptom responder criterion in each of the last 6 of the 12 weeks of treatment|Percentage of patients meeting the vomiting symptom responder criterion in each of the last 6 of the 12 weeks of treatment|Percentage of Patients Meeting the Nausea Responder Criterion|Percentage of Patients Meeting the Abdominal Pain Responder Criterion|Percent…	t of patients meeting the diabetic gastroparesis DG symptom responder criterion in each of the last 6 of the 12 weeks of treatment Patients will assess severity of DG symptoms daily using an 11 point ordinal scale with 0 least and 10 worst possible score Patients will enter the score using an e diary t of patients meeting the vomiting symptom responder criterion in each of the last 6 of the 12 we…
Phase	NCT01276730	CTRI/2019/03/018285	Interventional	Interventional	Phase 2	Phase 4	Cervical Cancer	C61||Maligt neoplasm of prostate,	Drug: Interferon, Retinoic Acid and radiation|Drug: Cisplatin and radiation	MRI guided biopsy of prostate and CEUS of prostate	University of Louisville|James Graham Brown Cancer Center	Departement of Radiodiagnosis AIIMS New Delhi, Institutional (AIIMS	Advanced Cervical Cancer Trial in India	A clinical trial to study the role of advanced imaging modalities in evaluation of prostate cancer	Role of advanced ultrasound and advanced MRI in evaluation of prostate cancer	Survival|Response rate|Overall toxicity|Determine immune response to Human Papillomavirus HPV	Prostate cancer detection rate comparison for MRI ingantry targeted biopsy and MRI-TRUS fusion targeted biopsies and CEUS-guided targeted biopsies compared with 12-core systematic biopsies, Cancer detection rate by biopsy within 1 week of MRI
Sponsors and sites different	NCT01406717	CTRI/2019/04/018494	Interventional	Interventional	Phase 3		Type 2 Diabetes Mellitus	E119||Type 2 diabetes mellitus without complications,	Drug: SPIL1033, Placebo	Ayurveda drug	Sun Pharmaceutical Industries Limited	Jivanti Welfare and Charitable Trust, Jivanti Welfare and Charitable Trust	Safety and Efficacy of SPIL1033 in Subjects With Type 2 Diabetes Mellitus	Management of Type 2 Diabetes Mellitus through Ayurveda	A Field Study on Ayurvedic Management of Type 2 Diabetes Mellitus	Proportion of subjects positive for anti-exenatide antibodies.|Incidence of potentially immune-related treatment-emergent adverse events will be evaluated.|Investigator's global impression of change.|Shifts in vital signs and other laboratory safety parameters from baseline to end-of-trial.|Other (non-immune-related) treatment-emergent adverse events will be evaluated.|Subject's global impression…	FBS, HbA1C, 0,3,6,12 Months	34 locations	4 locations
CTRI provides same CTG secondary ID	NCT03954834	CTRI/2019/06/019637	Interventional	Interventional	Phase 3	Phase 3	Type 2 Diabetes Mellitus	E118||Type 2 diabetes mellitus with unspecified complications,	Drug: Tirzepatide|Drug: Placebo	Tirzepatide	Eli Lilly and Company	Eli Lilly and Company India Pvt Ltd, Eli Lilly and Company India PVT LTD	A Study of Tirzepatide (LY3298176) in Participants With Type 2 Diabetes Not Controlled With Diet and Exercise Alone	Comparison of Tirzepatide with Placebo in Patients with Type 2 Diabetes	A Randomized, Double-blind, Placebo-Controlled Trial Comparing the Efficacy and Safety of Three Tirzepatide Doses versus Placebo in Patients with Type 2 Diabetes, Inadequately Controlled with Diet and Exercise Alone	Change from Baseline in Hemoglobin A1c (HbA1c)|Change from Baseline in Body Weight|Percentage of Participants with HbA1c Target Value of <7%|Change from Baseline in Fasting Serum Glucose|Percentage of Participants with HbA1c Target Value of <5.7%|Mean Change from Baseline in Daily Average 7-Point Self-Monitored Blood Glucose (SMBG) Values|Percentage of Participants who Achieved Weight Loss ≥5%|Ra…	To demonstrate that tirzepatide QW 5 mg and/or 10 mg and/or 15 mg are superior to placebo in HbA1c change from baseline to 40 weeks Mean change in HbA1c
										CHECK and CHANGE THE INTERVENTION COLUMNS
